# Supplementary material for: Genome-Wide Gene Expression Profiles in Lung Tissues of Pig Breeds Differing in Resistance to Porcine Reproductive and Respiratory Syndrome Virus
Source: PubMed Central journal article supplement (PMC3900479; doi:10.1371/journal.pone.0086101), 2014-01-23

Figure S1

Ko04012

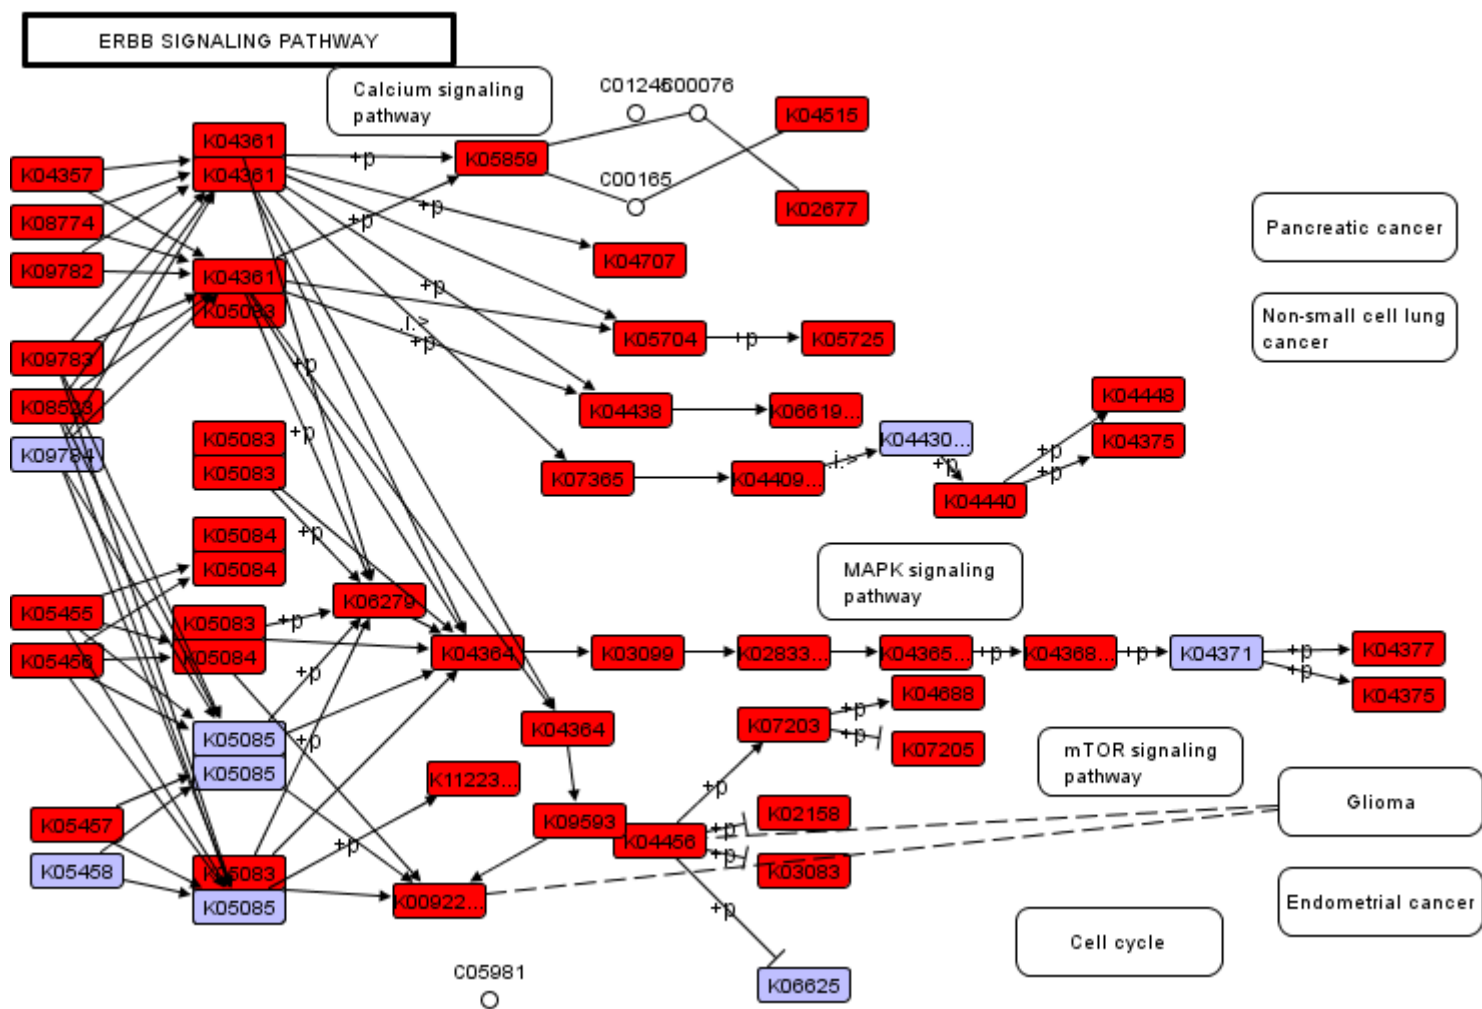

Ko04144

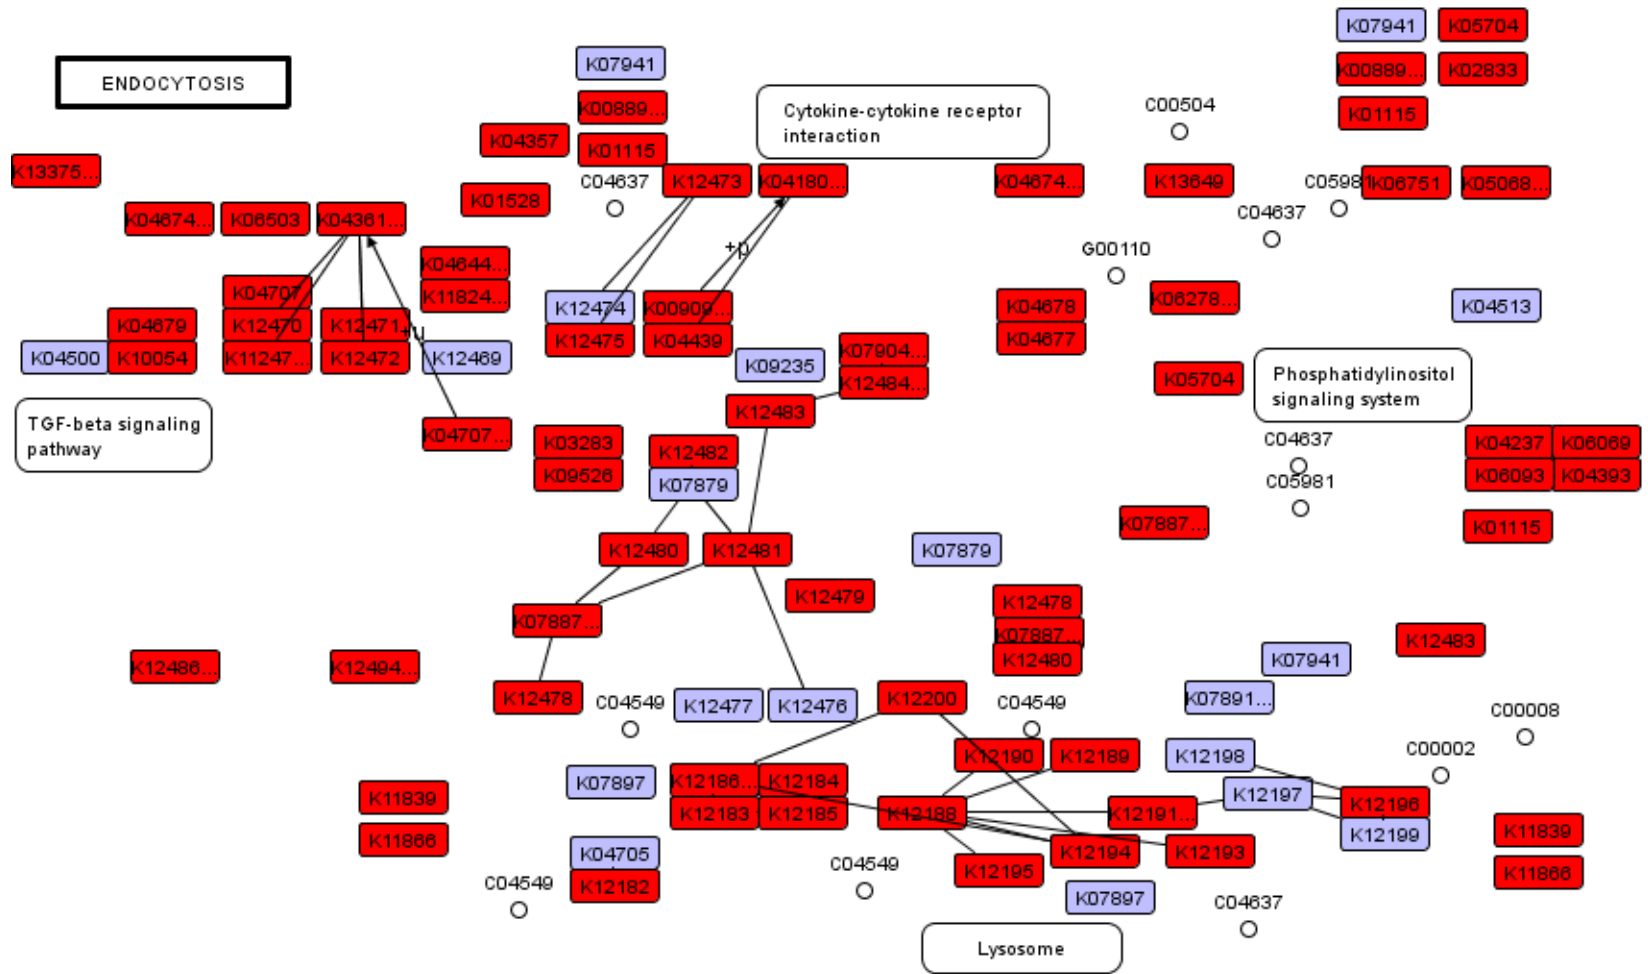

Ko04630

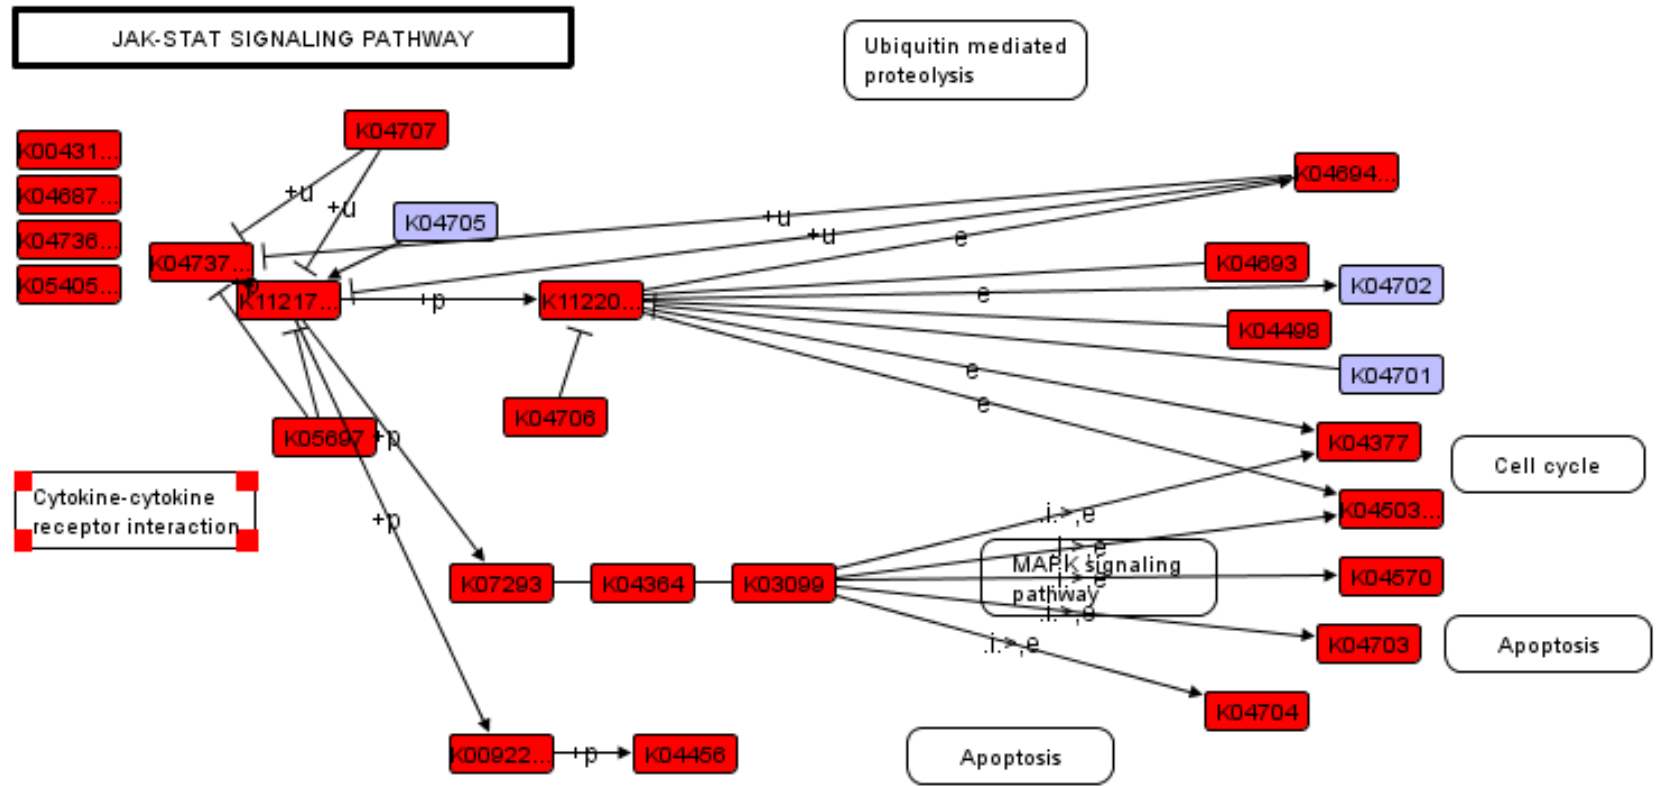

Ko04660

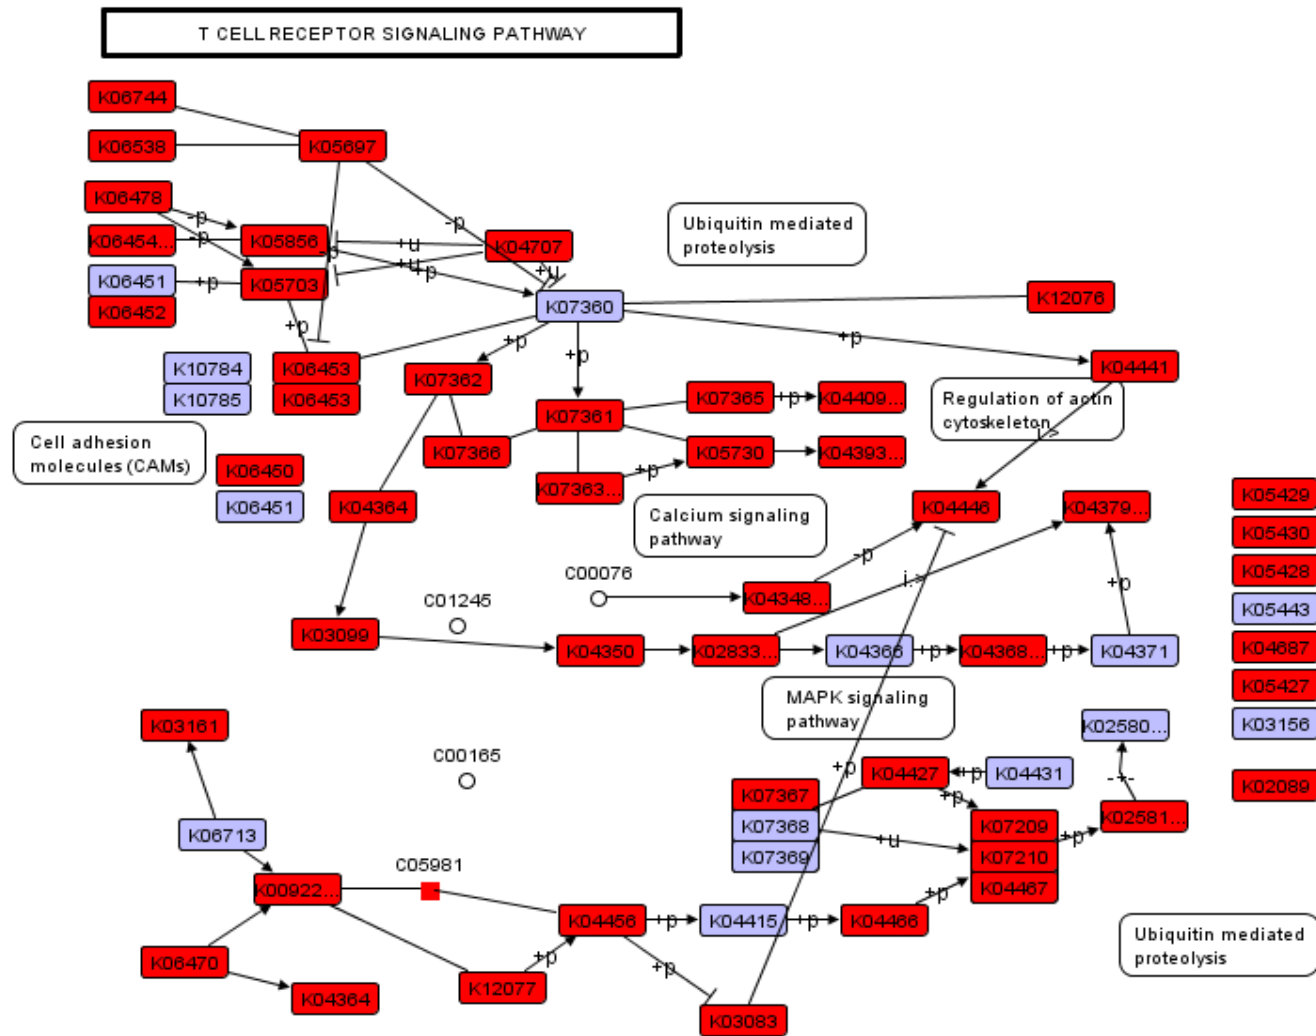

Ko04810

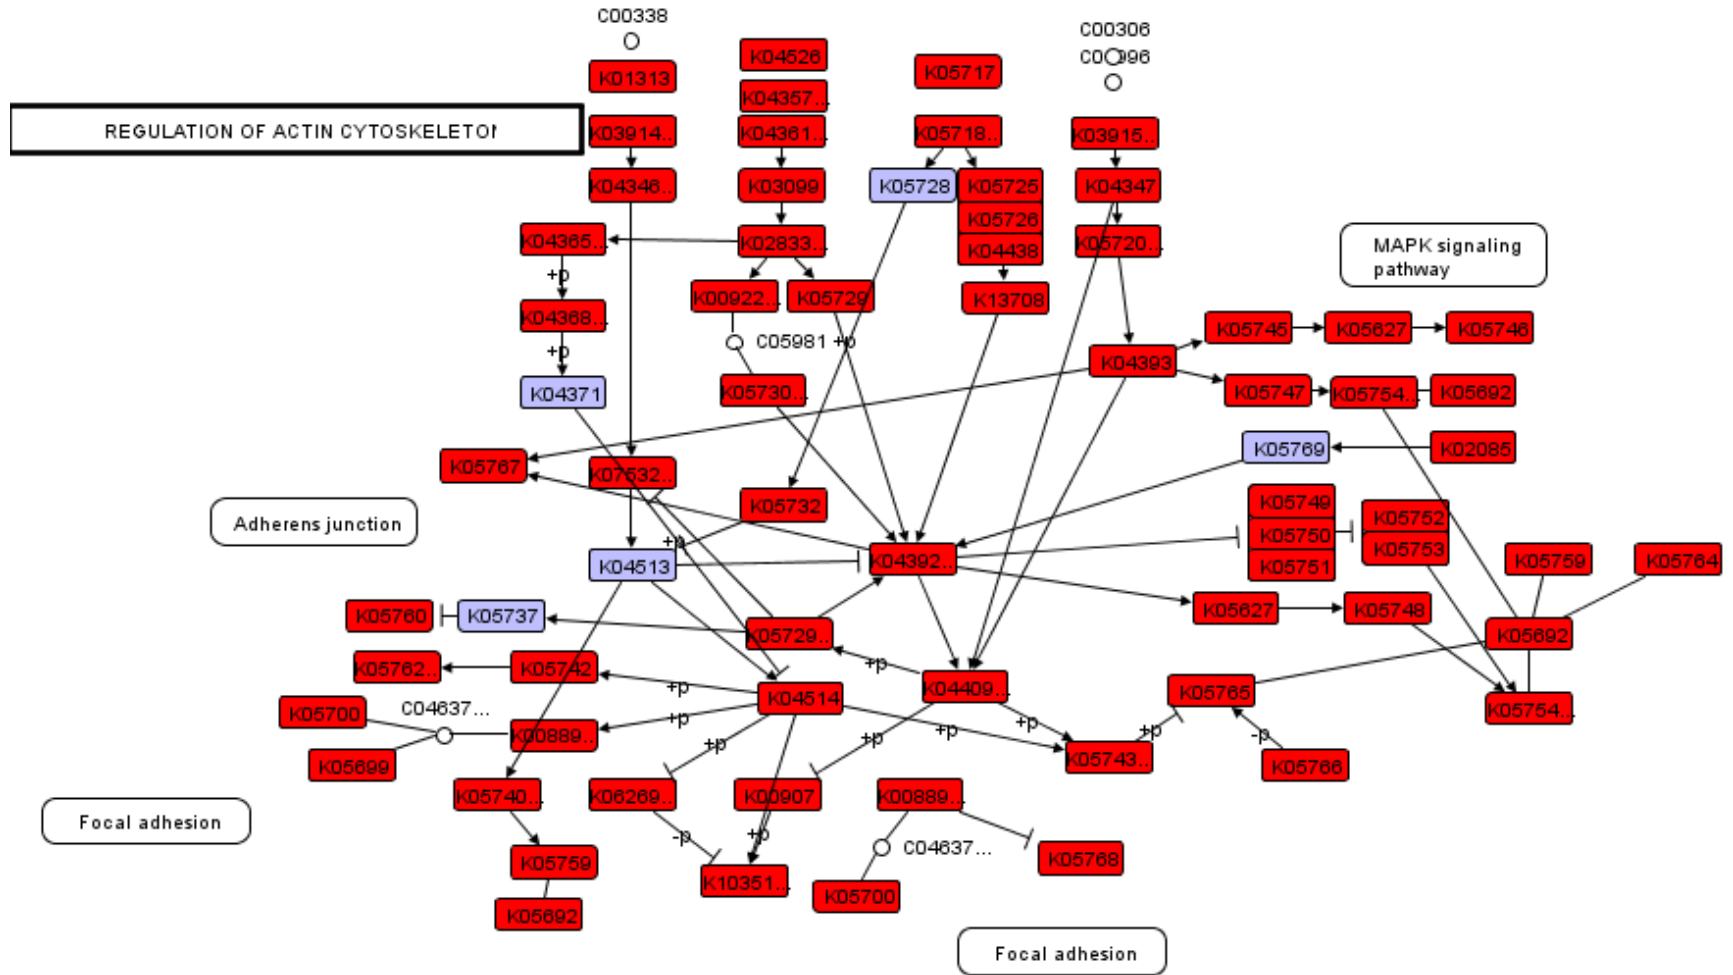

Ko04910

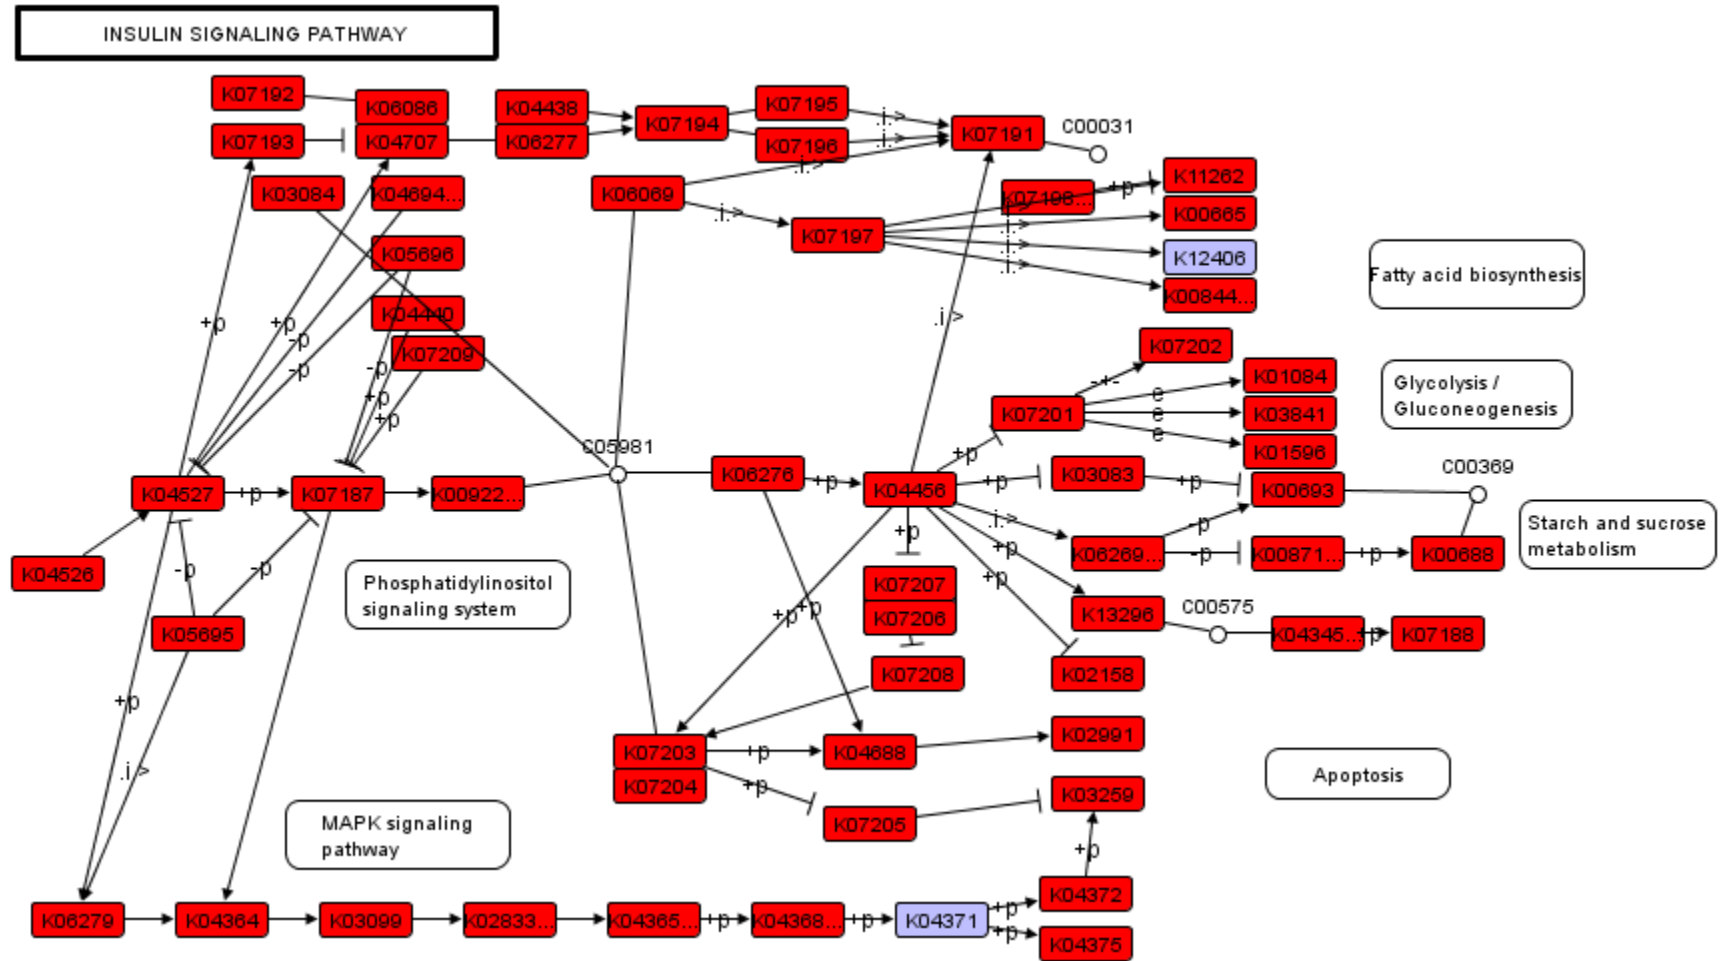

Ko05100

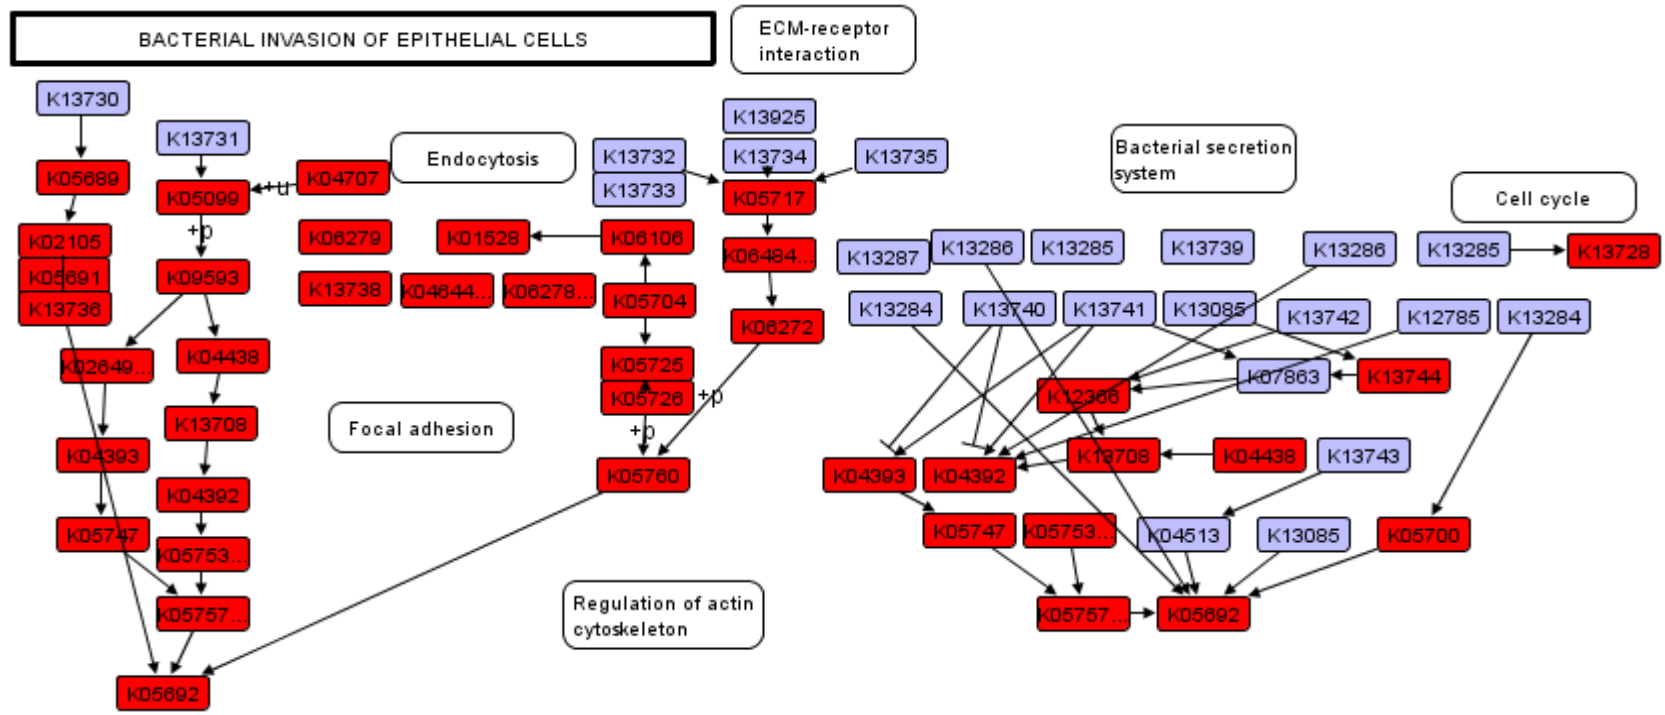

Ko05220

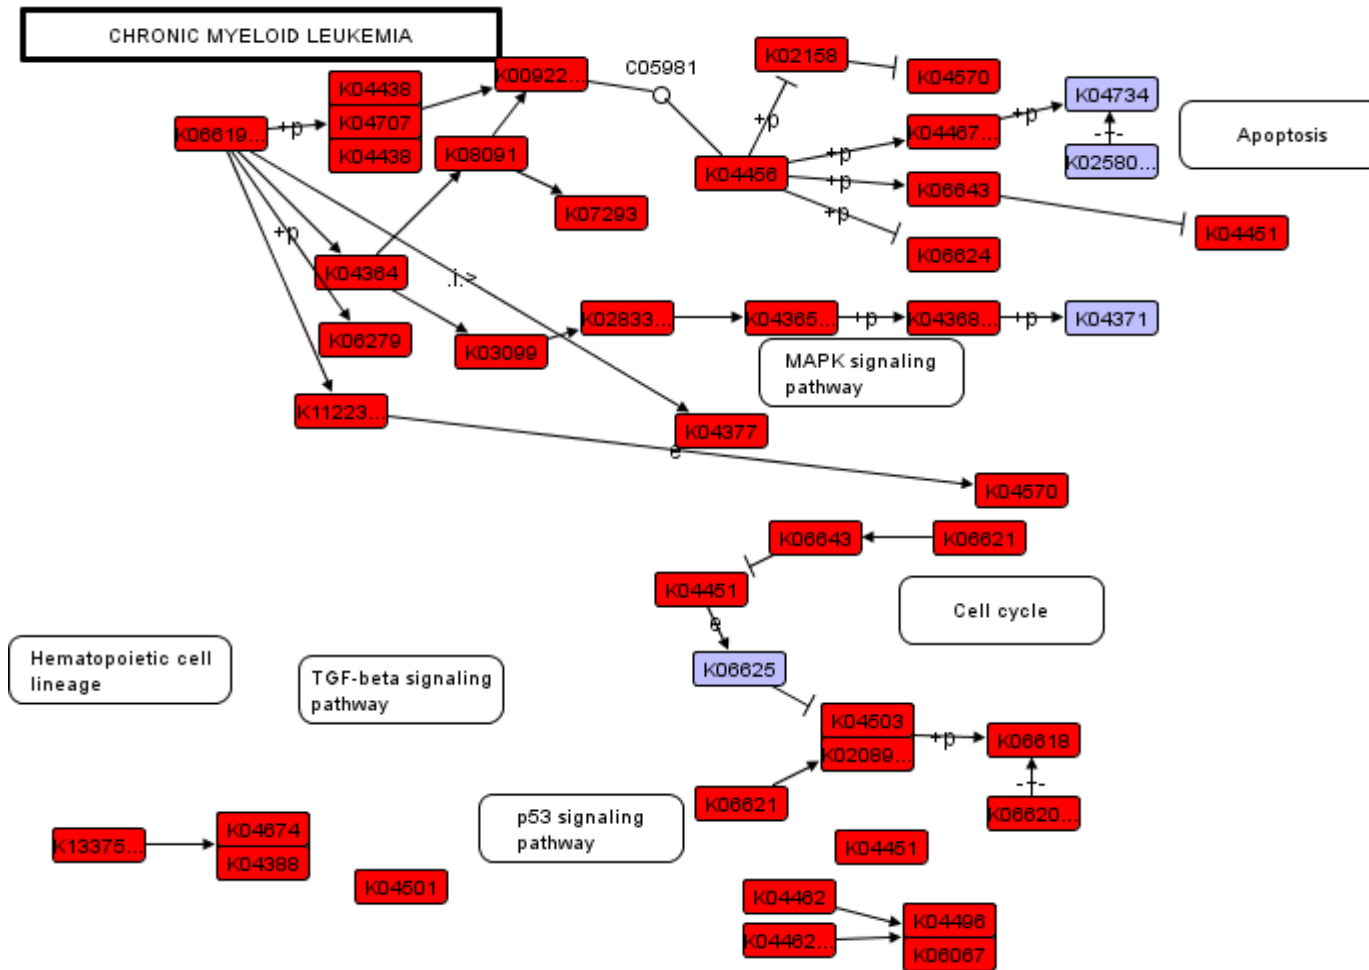

Supplement: pone.0086101.s001.pdf [file pone.0086101.s001.pdf]
